# Supplementary material
Source: Springer Nature journal article supplement (https://www.springermedizin.de/resource/supplementary/12990_2009_257_MOESM7_ESM.pdf/9612900)

**A Sham**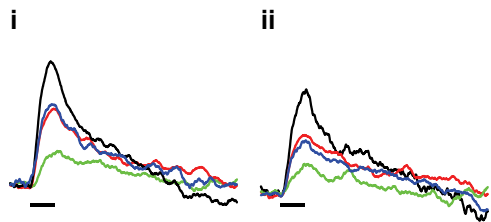**B SNL**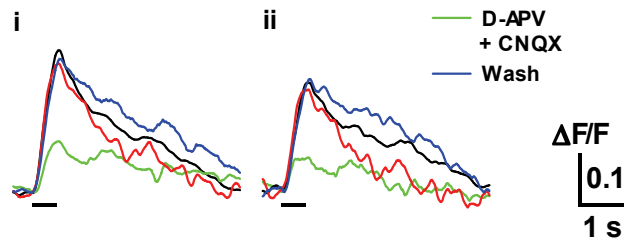**C**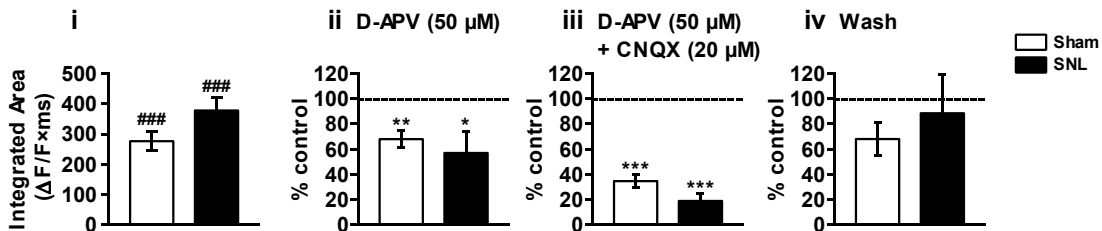**D**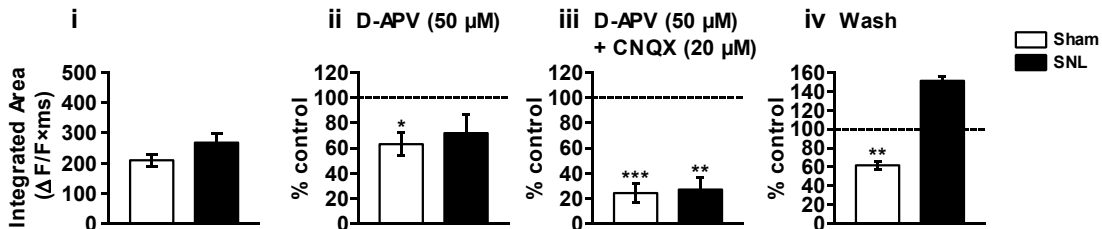

Supplement: MOESM7 [file 9612900]
